# Supplementary material
Source: PubMed Central journal article supplement (PMC7536575)
Supplement: mmc1.pdf [file mmc1.pdf]

## Supplemental Data

### Genomic Sequencing for Newborn Screening:

#### Results of the NC NEXUS Project

Tamara S. Roman, Stephanie B. Crowley, Myra I. Roche, Ann Katherine M. Foreman, Julianne M. O'Daniel, Bryce A. Seifert, Kristy Lee, Alicia Brandt, Chelsea Gustafson, Daniela M. DeCristo, Natasha T. Strande, Lori Ramkissoo, Laura V. Milko, Phillips Owen, Sayanty Roy, Mai Xiong, Ryan S. Paquin, Rita M. Butterfield, Megan A. Lewis, Katherine J. Souris, Donald B. Bailey Jr., Christine Rini, Jessica K. Booker, Bradford C. Powell, Karen E. Weck, Cynthia M. Powell, and Jonathan S. Berg

| Self-reported race and/or ethnicity                                           | Percentage |
|-------------------------------------------------------------------------------|------------|
| White                                                                         | 66%        |
| Black/African American                                                        | 10%        |
| Asian                                                                         | 5%         |
| Asian and White                                                               | 3%         |
| White and Black/African American                                              | 3%         |
| White and Native American                                                     | 3%         |
| White and other (unknown, or not reported, or Latino)                         | 3%         |
| Latina/Latino and Hispanic or Latino                                          | 2%         |
| Not reported                                                                  | 2%         |
| Adopted from China                                                            | 1%         |
| Asian and other                                                               | 1%         |
| Black/African American and Pacific Islander                                   | 1%         |
| Self-reported completed education level                                       | Percentage |
| Graduate degree (both parents)                                                | 26%        |
| Graduate degree (one parent) and four years college (one parent)              | 20%        |
| Four years college (one parent) and partial or two years college (one parent) | 14%        |
| Four years college (both parents)                                             | 8%         |
| Graduate degree (one parent) and partial or two years college (one parent)    | 4%         |
| Two or four years college (one parent) and high school/GED (one parent)       | 4%         |
| High school or GED (both parents)                                             | 4%         |
| High school or GED (mother reported only)                                     | 4%         |
| Two years college (one parent) and partial college (one parent)               | 3%         |
| Partial college (one parent) and high school/GED (one parent)                 | 3%         |
| Partial, two or 4 years of college (mother reported only)                     | 3%         |
| Graduate degree (mother reported only)                                        | 2%         |
| Graduate degree (one parent) and high school/GED (one parent)                 | 2%         |

|                                                                         |    |
|-------------------------------------------------------------------------|----|
| Four years college (one parent) and completed trade school (one parent) | 1% |
| Partial college (both parents)                                          | 1% |
| High school/GED (one parent) and less than high school (one parent)     | 1% |

**Table S1. Parents' self-reported demographics in the NC NEXUS study.** The demographics were provided by both parents in the study, with the exception of nine individuals in the education level category (indicated by mother reported only). One participant in the NC NEXUS study was adopted from China (as indicated in the table); therefore, their adoptive parents did not report their self-identified race and/or ethnicity information. N=106 NC NEXUS study participants.

| NC NEXUS participant | Childhood onset nonactionable category | Adult onset actionable category    | Carrier list category                                                                                                                          | Gene (s)                                                                                                       | Disease association with gene (disease inheritance)                                                                                                                                          | Variant and (predicted protein change)                                                                                                                                                                                                                                  | Zygoty in NC NEXUS participant                               |
|----------------------|----------------------------------------|------------------------------------|------------------------------------------------------------------------------------------------------------------------------------------------|----------------------------------------------------------------------------------------------------------------|----------------------------------------------------------------------------------------------------------------------------------------------------------------------------------------------|-------------------------------------------------------------------------------------------------------------------------------------------------------------------------------------------------------------------------------------------------------------------------|--------------------------------------------------------------|
| M001                 | negative                               | negative                           | positive for four variants ( <i>HFE</i> , <i>CFTR</i> , <i>GUSB</i> , <i>AGK</i> ; see gene column)                                            | <i>HFE</i> , <i>CFTR</i> , <i>GUSB</i> , <i>AGK</i>                                                            | hemochromatosis (AR); cystic fibrosis (AR); mucopolysaccharidosis VII (AR); Sengers syndrome (AR)                                                                                            | <i>HFE</i> c.845G>A p.(Cys282Tyr); <i>CFTR</i> c.1521_1523del p.(Phe508del); <i>GUSB</i> c.1069C>T p.(Arg357*); <i>AGK</i> c.523_524del p.(Ile175fs)                                                                                                                    | heterozygous for all four variants listed in variant column  |
| M002                 | not requested                          | negative                           | not requested                                                                                                                                  | N/A                                                                                                            | N/A                                                                                                                                                                                          | N/A                                                                                                                                                                                                                                                                     | N/A                                                          |
| M003                 | negative                               | negative                           | positive for seven variants ( <i>SIL1</i> , <i>CYP21A2</i> , <i>SLC26A4</i> , <i>SERPINA1</i> , <i>ACADM</i> , <i>HPS3</i> , <i>RNASEH2B</i> ) | <i>SIL1</i> , <i>CYP21A2</i> , <i>SLC26A4</i> , <i>SERPINA1</i> , <i>ACADM</i> , <i>HPS3</i> , <i>RNASEH2B</i> | Marinesco-Sjogren syndrome (AR); 21-hydroxylase deficiency (AR); Pendred syndrome (AR); Alpha-1 antitrypsin deficiency (AR); Hermansky-Pudlak syndrome (AR), Aicardi-Goutières syndrome (AR) | <i>SIL1</i> c.645+2T>C p.(?); <i>CYP21A2</i> c.1360C>T p.(Pro454Ser); <i>SLC26A4</i> c.2015G>A p.(Gly672Glu); <i>SERPINA1</i> c.1096G>A p.(Glu366Lys); <i>ACADM</i> c.985A>G p.(Lys329Glu); <i>HPS3</i> c.1682_1683del p.(Cys561fs); <i>RNASEH2B</i> c.2T>C p.(Met1Thr) | heterozygous for all seven variants listed in variant column |
| M005                 | not requested                          | negative                           | positive- <i>RBM8A</i> and <i>HFE</i> variants                                                                                                 | <i>RBM8A</i> , <i>HFE</i>                                                                                      | thrombocytopenia-absent radius (TAR) syndrome (AR); hemochromatosis (AR)                                                                                                                     | <i>RBM8A</i> n.500C>T c.-21G>A p.(?); <i>HFE</i> c.187C>G p.(His63Asp)                                                                                                                                                                                                  | heterozygous for both variants listed in variant column      |
| M006                 | negative                               | negative                           | not requested                                                                                                                                  | N/A                                                                                                            | N/A                                                                                                                                                                                          | N/A                                                                                                                                                                                                                                                                     | N/A                                                          |
| M007                 | negative                               | positive for <i>RAD51C</i> variant | positive for five variants ( <i>RAD51C</i> , <i>SMARCAL1</i> , <i>TYR</i> , <i>SERPINA1</i> , <i>AARS2</i> )                                   | <i>RAD51C</i> , <i>SMARCAL1</i> , <i>TYR</i> , <i>SERPINA1</i> , <i>AARS2</i>                                  | ovarian cancer (AD); Fanconi anemia (AR); Schimke immunosseous dysplasia (AR); Alpha 1 antitrypsin deficiency (AR); combined oxidative phosphorylation deficiency (AR)                       | <i>RAD51C</i> c.905-2_905-1del p.(?); <i>SMARCAL1</i> c.2542G>T p.(Glu848*); <i>TYR</i> c.1217C>T p.(Pro406Leu); <i>SERPINA1</i> c.1096G>A p.(Glu366Lys); <i>AARS2</i> c.2599-1G>A p.(?)                                                                                | heterozygous for all five variants in variant column         |
| M008                 | negative                               | negative                           | positive- <i>SERPINA1</i> variant                                                                                                              | <i>SERPINA1</i>                                                                                                | alpha-1 antitrypsin deficiency (AR)                                                                                                                                                          | c.863A>T p.(Glu288Val)                                                                                                                                                                                                                                                  | homozygous                                                   |

|       |               |                  |                                                                                                                  |                                                                                   |                                                                                                                                                                                                                                                |                                                                                                                                                                                                                                                                                      |                                                                                                                        |
|-------|---------------|------------------|------------------------------------------------------------------------------------------------------------------|-----------------------------------------------------------------------------------|------------------------------------------------------------------------------------------------------------------------------------------------------------------------------------------------------------------------------------------------|--------------------------------------------------------------------------------------------------------------------------------------------------------------------------------------------------------------------------------------------------------------------------------------|------------------------------------------------------------------------------------------------------------------------|
| M009  | negative      | negative         | positive-<br><i>G6PD</i><br>variants                                                                             | <i>G6PD</i>                                                                       | hemolytic anemia (XL)                                                                                                                                                                                                                          | c.292G>A<br>p.(Val98Met);<br>c.466A>G<br>p.(Asn156Asp)                                                                                                                                                                                                                               | heterozygous<br>for both<br><i>G6PD</i><br>variants                                                                    |
| M011  | negative      | negative         | positive-<br><i>RPE65</i> and<br><i>IDUA</i><br>variants                                                         | <i>RPE65</i> ,<br><i>IDUA</i>                                                     | retinitis pigmentosa<br>(AR); Leber congenital<br>amaurosis (AR);<br>mucopolysaccharidosis<br>type I (AR)                                                                                                                                      | <i>RPE65</i><br>c.271C>T<br>p.(Arg91Trp);<br><i>IDUA</i> c.208C>T<br>p.(Gln70*)                                                                                                                                                                                                      | heterozygous<br>for both<br>variants in<br>variant<br>column                                                           |
| M013  | negative      | negative         | positive for<br>variants in<br><i>HFE</i> , <i>GALT</i> ,<br><i>VWF</i> ,<br><i>KIAA0586</i> ,<br><i>ATP13A2</i> | <i>HFE</i> , <i>GALT</i> ,<br><i>VWF</i> ,<br><i>KIAA0586</i> ,<br><i>ATP13A2</i> | hemochromatosis (AR);<br>galactosemia (AR); von<br>Willebrand disease type<br>2N (AR or AD); Joubert<br>syndrome and/or short<br>rib thoracic dysplasia<br>with polydactyly (AR);<br>Kufor-Rakeb syndrome<br>and/or spastic<br>paraplegia (AR) | <i>HFE</i> c.845G>A<br>p.(Cys282Tyr);<br><i>GALT</i> c.378-<br>27G>C,<br>c.507+62G>A,<br>c.508-24G>A,<br>c.940A>G<br>p.(Asn314Asp);<br><i>VWF</i><br>c.2561G>A<br>p.(Arg854Gln);<br><i>KIAA0586</i><br>c.428del<br>p.(Arg143fs);<br><i>ATP13A2</i><br>c.2135_2136del<br>p.(Val712fs) | heterozygous<br>for all<br>variants listed<br>in variant<br>column                                                     |
| M014  | negative      | negative         | positive-<br><i>WRN</i><br>variant                                                                               | <i>WRN</i>                                                                        | Werner syndrome (AR)                                                                                                                                                                                                                           | c.561A>G<br>p.(Lys187fs)                                                                                                                                                                                                                                                             | heterozygous                                                                                                           |
| M015  | not requested | not<br>requested | positive- <i>HFE</i><br>variant                                                                                  | <i>HFE</i>                                                                        | hemochromatosis (AR)                                                                                                                                                                                                                           | c.187C>G<br>p.(His63Asp)                                                                                                                                                                                                                                                             | heterozygous                                                                                                           |
| M017  | negative      | negative         | positive for<br>variants in<br><i>HFE</i> , <i>PEX1</i> ,<br><i>GALT</i>                                         | <i>HFE</i> , <i>PEX1</i> ,<br><i>GALT</i>                                         | hemochromatosis (AR);<br>Zellweger spectrum<br>disorder (AR);<br>galactosemia (AR)                                                                                                                                                             | <i>HFE</i> c.187C>G,<br>p.(His63Asp);<br><i>PEX1</i><br>c.2614C>T<br>p.(Arg872*);<br><i>GALT</i> c.378-<br>27G>C,<br>c.507+62G>A,<br>c.508-24G>A,<br>c.940A>G<br>p.(Asn314Asp)                                                                                                       | heterozygous<br>for the <i>HFE</i><br>variant and<br><i>PEX1</i> variant;<br>homozygous<br>for <i>GALT</i><br>variants |
| HL001 | negative      | negative         | positive- <i>HFE</i><br>and <i>PHYH</i><br>variants                                                              | <i>HFE</i> , <i>PHYH</i>                                                          | hemochromatosis (AR);<br>Refsum disease (AR)                                                                                                                                                                                                   | <i>HFE</i> c.187C>G<br>p.(His63Asp);<br><i>PHYH</i> c.823C>T<br>p.(Arg275Trp)                                                                                                                                                                                                        | heterozygous<br>for both<br>variants in<br>variant<br>column                                                           |
| HL002 | negative      | negative         | positive-<br><i>GNE</i><br>variant                                                                               | <i>GNE</i>                                                                        | Nonaka myopathy (AR)                                                                                                                                                                                                                           | c.1985C>T<br>p.(Ala662Val)                                                                                                                                                                                                                                                           | heterozygous                                                                                                           |
| HL004 | not requested | negative         | positive- <i>HFE</i><br>variant                                                                                  | <i>HFE</i>                                                                        | hemochromatosis (AR)                                                                                                                                                                                                                           | c.187C>G<br>p.(His63Asp)                                                                                                                                                                                                                                                             | heterozygous                                                                                                           |
| HL006 | negative      | negative         | positive-<br><i>RBM8A</i> and<br><i>MMAB</i><br>variants                                                         | <i>RBM8A</i> ,<br><i>MMAB</i>                                                     | thrombocytopenia-<br>absent radius<br>syndrome (AR);<br>methylmalonic<br>acidemia (AR)                                                                                                                                                         | <i>RBM8A</i><br>n.500C>T<br>c.-21G>A p.(?);<br><i>MMAB</i><br>c.556C>T<br>p.(Arg186Trp)                                                                                                                                                                                              | heterozygous<br>for both<br>variants in<br>variant<br>column                                                           |

|       |                                  |          |                                                                                                                         |                                                                                          |                                                                                                                                                                                                                                                                                                                              |                                                                                                                                                                                                                                                                                                                                |                                                                    |
|-------|----------------------------------|----------|-------------------------------------------------------------------------------------------------------------------------|------------------------------------------------------------------------------------------|------------------------------------------------------------------------------------------------------------------------------------------------------------------------------------------------------------------------------------------------------------------------------------------------------------------------------|--------------------------------------------------------------------------------------------------------------------------------------------------------------------------------------------------------------------------------------------------------------------------------------------------------------------------------|--------------------------------------------------------------------|
| HL007 | negative                         | negative | positive-<br><i>GALT</i> and <i>F5</i><br>variants                                                                      | <i>GALT, F5</i>                                                                          | galactosemia (AR);<br>Factor V deficiency<br>(AR)                                                                                                                                                                                                                                                                            | <i>GALT</i> c.563A>G<br>p.(Gln188Arg);<br><i>F5</i> c.1601G>A<br>p.(Arg534Gln)                                                                                                                                                                                                                                                 | heterozygous<br>for both<br>variants in<br>variant<br>column       |
| HL008 | negative                         | negative | positive-<br><i>SERPINA1</i><br>variant                                                                                 | <i>SERPINA1</i>                                                                          | alpha-1 antitrypsin<br>deficiency (AR)                                                                                                                                                                                                                                                                                       | c.863A>T<br>p.(Glu288Val)                                                                                                                                                                                                                                                                                                      | heterozygous                                                       |
| HL015 | positive-<br><i>OCRL</i> variant | negative | negative                                                                                                                | <i>OCRL</i>                                                                              | Lowe syndrome (XL)                                                                                                                                                                                                                                                                                                           | c.741G>A<br>p.(Trp247*)                                                                                                                                                                                                                                                                                                        | Hemizygous                                                         |
| HL016 | negative                         | negative | positive-<br><i>MMACHC</i><br>variant                                                                                   | <i>MMACHC</i>                                                                            | methylmalonic<br>acidemia<br>w/homocystinuria type<br>cblC (AR)                                                                                                                                                                                                                                                              | c.331C>T<br>p.(Arg111*)                                                                                                                                                                                                                                                                                                        | heterozygous                                                       |
| HL017 | negative                         | negative | negative                                                                                                                | N/A                                                                                      | N/A                                                                                                                                                                                                                                                                                                                          | N/A                                                                                                                                                                                                                                                                                                                            | N/A                                                                |
| HL019 | negative                         | negative | negative                                                                                                                | N/A                                                                                      | N/A                                                                                                                                                                                                                                                                                                                          | N/A                                                                                                                                                                                                                                                                                                                            | N/A                                                                |
| HL022 | negative                         | negative | positive-<br><i>CYP21A2</i><br>and <i>APTX</i><br>variants                                                              | <i>CYP21A2,</i><br><i>APTX</i>                                                           | 21-hydroxylase<br>deficiency (AR); ataxia<br>w/oculomotor apraxia<br>(AR)                                                                                                                                                                                                                                                    | <i>CYP21A2</i><br>c.1360C>T<br>p.(Pro454Ser);<br><i>APTX</i> c.837G>A<br>p.(Trp279*)                                                                                                                                                                                                                                           | heterozygous<br>for both<br>variants in<br>variant<br>column       |
| HL023 | negative                         | negative | positive for<br>variants in<br><i>IGHMBP2,</i><br><i>G6PC,</i><br><i>SERPINA1,</i><br><i>NR2E3, HFE,</i><br><i>GALT</i> | <i>IGHMBP2,</i><br><i>G6PC,</i><br><i>SERPINA1,</i><br><i>NR2E3,</i><br><i>HFE, GALT</i> | Charcot-Marie-Tooth<br>disease axonal type 2S<br>(AR); spinal muscular<br>atrophy with respiratory<br>distress (AR); glycogen<br>storage disease type I<br>(AR); alpha-1<br>antitrypsin deficiency<br>(AR); retinitis<br>pigmentosa (AR);<br>enhanced S-cone<br>syndrome (AR);<br>hemochromatosis (AR);<br>galactosemia (AR) | <i>IGHMBP2</i><br>c.1488C>A<br>p.(Cys496*);<br><i>G6PC</i><br>c.562G>A<br>p.(Gly188Ser);<br><i>SERPINA1</i><br>c.1096G>A<br>p.(Glu366Lys);<br><i>NR2E3</i><br>c.932G>A<br>p.(Arg311Gln);<br><i>HFE</i> c.845G>A<br>p.(Cys282Tyr);<br><i>GALT</i> c.378-<br>27G>C,<br>c.507+62G>A,<br>c.508-24G>A,<br>c.940A>G<br>p.(Asn314Asp) | heterozygous<br>for all<br>variants listed<br>in variant<br>column |
| HL025 | negative                         | negative | positive- <i>IDUA</i><br>and <i>F5</i><br>variants                                                                      | <i>IDUA, F5</i>                                                                          | MPS I (AR); Factor V<br>deficiency (AR)                                                                                                                                                                                                                                                                                      | <i>IDUA</i> c.979G>C<br>p.(Ala327Pro);<br><i>F5</i> c.1601G>A<br>p.(Arg534Gln)                                                                                                                                                                                                                                                 | heterozygous<br>for both<br>variants in<br>variant<br>column       |
| HL027 | negative                         | negative | positive for<br>three variants<br>( <i>GNRHR,</i><br><i>ATP13A2,</i><br><i>RBM8A</i> )                                  | <i>GNRHR,</i><br><i>ATP13A2,</i><br><i>RBM8A</i>                                         | Hypogonadotropic<br>hypogonadism 7 w/or<br>w/o anosmia (AR);<br>Kufor-Rakeb syndrome<br>and spastic paraplegia<br>(both AR);<br>thrombocytopenia<br>absent radius (TAR)<br>syndrome (AR)                                                                                                                                     | <i>GNRHR</i><br>c.785G>A<br>p.(Arg262Gln);<br><i>ATP13A2</i> c.558-<br>1G>T p.(?);<br><i>RBM8A</i><br>n.500C>T<br>c.-21G>A p.(?)                                                                                                                                                                                               | heterozygous<br>for all three<br>variants in<br>variant<br>column  |

|       |               |          |                                                                                         |                                                             |                                                                                                                                                                                                  |                                                                                                                                                             |                                                      |
|-------|---------------|----------|-----------------------------------------------------------------------------------------|-------------------------------------------------------------|--------------------------------------------------------------------------------------------------------------------------------------------------------------------------------------------------|-------------------------------------------------------------------------------------------------------------------------------------------------------------|------------------------------------------------------|
| HL028 | negative      | negative | positive- <i>SERPINA1</i> variant                                                       | <i>SERPINA1</i>                                             | alpha-1 antitrypsin deficiency (AR)                                                                                                                                                              | <i>SERPINA1</i> c.1096G>A p.(Glu366Lys)                                                                                                                     | heterozygous                                         |
| NB002 | negative      | negative | negative                                                                                | N/A                                                         | N/A                                                                                                                                                                                              | N/A                                                                                                                                                         | N/A                                                  |
| NB003 | negative      | negative | positive- <i>HFE</i> variant                                                            | <i>HFE</i>                                                  | hemochromatosis (AR)                                                                                                                                                                             | c.187C>G p.(His63Asp)                                                                                                                                       | heterozygous                                         |
| NB004 | negative      | negative | positive for 4 variants ( <i>CFTR</i> , <i>POLG</i> , <i>SERPINA1</i> , <i>SLC7A9</i> ) | <i>CFTR</i> , <i>POLG</i> , <i>SERPINA1</i> , <i>SLC7A9</i> | cystic fibrosis (AR); <i>POLG</i> -related spectrum disorders (AD or AR); alpha-1 antitrypsin deficiency (AR); cystinuria (AR)                                                                   | <i>CFTR</i> c.1521_1523del p.(Phe508del); <i>POLG</i> c.1399G>A p.(Ala467Thr); <i>SERPINA1</i> c.863A>T p.(Glu288Val); <i>SLC7A9</i> c.544G>A p.(Ala182Thr) | heterozygous for all four variants in variant column |
| NB005 | negative      | negative | negative                                                                                | N/A                                                         | N/A                                                                                                                                                                                              | N/A                                                                                                                                                         | N/A                                                  |
| NB007 | not requested | negative | positive- <i>HFE</i> variant                                                            | <i>HFE</i>                                                  | hemochromatosis (AR)                                                                                                                                                                             | c.187C>G p.(His63Asp)                                                                                                                                       | heterozygous                                         |
| NB008 | negative      | negative | positive- <i>ERCC6</i> and <i>G6PD</i> variants                                         | <i>ERCC6</i> , <i>G6PD</i>                                  | Cockayne syndrome (AR); hemolytic anemia (XL)                                                                                                                                                    | <i>ERCC6</i> c.3952_3953del p.(Arg1318fs); <i>G6PD</i> c.292G>A p.(Val98Met); c.466A>G p.(Asn156Asp)                                                        | heterozygous for all variants in variant column      |
| NB011 | negative      | negative | negative                                                                                | N/A                                                         | N/A                                                                                                                                                                                              | N/A                                                                                                                                                         | N/A                                                  |
| NB012 | negative      | negative | negative                                                                                | N/A                                                         | N/A                                                                                                                                                                                              | N/A                                                                                                                                                         | N/A                                                  |
| NB013 | negative      | negative | positive for four variants ( <i>ARMC4</i> , <i>PFKM</i> , <i>PMM2</i> , <i>CEP290</i> ) | <i>ARMC4</i> , <i>PFKM</i> , <i>PMM2</i> , <i>CEP290</i>    | Primary ciliary dyskinesia (AR); glycogen storage disease type VII (AR); congenital disorder of glycosylation, type Ia (AR); range of disorders, including Senior-Loken or Joubert syndrome (AR) | <i>ARMC4</i> c.2219G>A p.(Trp740*); <i>PFKM</i> c.496C>T p.(Arg166*); <i>PMM2</i> c.422G>A p.(Arg141His); <i>CEP290</i> c.4437+1G>A p.(?)                   | heterozygous for all four variants in variant column |
| NB015 | negative      | negative | positive for 4 variants in <i>GALT</i>                                                  | <i>GALT</i>                                                 | galactosemia (AR)                                                                                                                                                                                | c.378-27G>C, c.507+62G>A, c.508-24G>A, c.940A>G p.(Asn314Asp). (These variants are associated with the Duarte 2 allele).                                    | heterozygous for all variants in variant column      |
| NB017 | negative      | negative | positive- <i>DYNC2H1</i> variant                                                        | <i>DYNC2H1</i>                                              | short-rib thoracic dysplasia (AR)                                                                                                                                                                | c.8283del p.(Phe2761fs)                                                                                                                                     | heterozygous                                         |
| NB018 | negative      | negative | positive- <i>HFE</i> variant                                                            | <i>HFE</i>                                                  | hemochromatosis (AR)                                                                                                                                                                             | c.845G>A p.(Cys282Tyr)                                                                                                                                      | heterozygous                                         |

|       |               |                         |                                                          |                                                               |                                                                                                                                                                                  |                                                                                                             |                                                                         |
|-------|---------------|-------------------------|----------------------------------------------------------|---------------------------------------------------------------|----------------------------------------------------------------------------------------------------------------------------------------------------------------------------------|-------------------------------------------------------------------------------------------------------------|-------------------------------------------------------------------------|
| NB020 | negative      | negative                | positive-GAA and CDK5RAP2 variants                       | GAA, CDK5RAP2                                                 | glycogen storage disease type II (AR); primary microcephaly (AR)                                                                                                                 | GAA c.-32-13T>G p.(?); CDKRAP2 c.4114C>T p.(Arg1372*)                                                       | heterozygous for both variants in variant column                        |
| NB025 | negative      | negative                | positive-HFE variant                                     | HFE                                                           | hemochromatosis (AR)                                                                                                                                                             | c.187C>G p.(His63Asp)                                                                                       | heterozygous                                                            |
| NB028 | not requested | negative                | not requested                                            | N/A                                                           | N/A                                                                                                                                                                              | N/A                                                                                                         | N/A                                                                     |
| NB031 | negative      | negative                | positive-MCCC1 variant                                   | MCCC1                                                         | 3-methylcrotonyl-coA carboxylase (3-MCC) deficiency (AR)                                                                                                                         | c.1483C>T p.(Gln495*)                                                                                       | heterozygous                                                            |
| NB033 | negative      | negative                | positive for four variants (SERPINA1, DARS2, MCPH1, HFE) | SERPINA1, DARS2, MCPH1, HFE                                   | alpha-1 antitrypsin deficiency (AR); leukoencephalopathy with brain stem and spinal cord involvement and lactate elevation (AR); primary microcephaly (AR); hemochromatosis (AR) | SERPINA1 c.863A>T p.(Glu288Val); DARS2 c.493-1G>C p.(?); MCPH1 c.2214+2T>C p.(?); HFE c.187C>G p.(His63Asp) | heterozygous for all four variants in variant column                    |
| NB037 | negative      | negative                | positive-USH2A and DOCK8 variants                        | USH2A, DOCK8                                                  | Usher syndrome (AR); hyper-IgE recurrent infection syndrome (AR)                                                                                                                 | USH2A c.6937G>T p.(Gly2313Cys); DOCK8 c.54-1G>T p.(?)                                                       | heterozygous for both variants in variant column                        |
| NB040 | negative      | positive, BRCA2 variant | positive-ASL and DNAH11 variants                         | BRCA2 (adult onset category), ASL (carrier), DNAH11 (carrier) | hereditary breast and ovarian cancer (AD); argininosuccinic aciduria (AR); primary ciliary dyskinesia (AR)                                                                       | BRCA2 c.7480C>T p.(Arg2494*); ASL c.544C>T p.(Arg182*); DNAH11 c.6983+1G>A p.(?)                            | heterozygous for all variants in variant column                         |
| NB041 | not requested | negative                | positive-GALT variant                                    | GALT                                                          | classical galactosemia (AR)                                                                                                                                                      | c.563A>G p.(Gln188Arg)                                                                                      | heterozygous                                                            |
| NB042 | negative      | not requested           | not requested                                            | N/A                                                           | N/A                                                                                                                                                                              | N/A                                                                                                         | N/A                                                                     |
| NB043 | negative      | negative                | positive for three variants (BBS1, VWF, CD36)            | BBS1, VWF, CD36                                               | Bardet-Biedl syndrome (AR); von Willebrand disease (AD or AR); platelet glycoprotein IV deficiency (AR)                                                                          | BBS1 c.1169T>G p.(Met390Arg); VWF c.2561G>A p.(Arg854Gln); CD36 c.787_808del p.(Val263fs)                   | heterozygous for all three variants in variant column                   |
| NB044 | negative      | negative                | negative                                                 | N/A                                                           | N/A                                                                                                                                                                              | N/A                                                                                                         | N/A                                                                     |
| NB047 | negative      | negative                | positive for three variants (RBM8A, HFE, SERPINA1)       | RBM8A, HFE, SERPINA1                                          | TAR syndrome (AR); hemochromatosis (AR); alpha-1 antitrypsin deficiency (AR)                                                                                                     | RBM8A n.500C>T c.-21G>A p.(?); HFE c.187C>G p.(His63Asp); SERPINA1 c.187C>T p.(Arg63Cys)                    | heterozygous for RBM8A variant and SERPINA1 variant; homozygous for HFE |



|       |               |          |                                                                     |                          |                                                              |                                                                                                                                                           |                                                  |
|-------|---------------|----------|---------------------------------------------------------------------|--------------------------|--------------------------------------------------------------|-----------------------------------------------------------------------------------------------------------------------------------------------------------|--------------------------------------------------|
| NB050 | negative      | negative | positive- <i>F7</i> and <i>HFE</i> variants                         | <i>F7, HFE</i>           | Factor VII deficiency (AR); hemochromatosis (AR)             | <i>F7</i> c.1151C>T p.(Thr384Met); <i>HFE</i> c.187C>G p.(His63Asp)                                                                                       | heterozygous for both variants in variant column |
| NB052 | negative      | negative | positive- <i>MPL</i> variant                                        | <i>MPL</i>               | congenital amegakaryocytic thrombocytopenia (AR)             | c.1192del p.(Trp398fs)                                                                                                                                    | heterozygous                                     |
| NB053 | not requested | negative | negative                                                            | N/A                      | N/A                                                          | N/A                                                                                                                                                       | N/A                                              |
| NB055 | negative      | negative | positive for variants in <i>GALT</i> , <i>ATP7B</i> and <i>CFTR</i> | <i>GALT, ATP7B, CFTR</i> | galactosemia (AR); Wilson disease (AR); cystic fibrosis (AR) | <i>GALT</i> c.378-27G>C, c.507+62G>A, c.508-24G>A, c.940A>G p.(Asn314Asp); <i>ATP7B</i> c.1934T>G p.(Met645Arg); <i>CFTR</i> c.1519_1521del p.(Ile507del) | heterozygous for all variants in variant column  |
| NB058 | not requested | negative | positive- <i>GJB2</i> variant                                       | <i>GJB2</i>              | nonsyndromic hearing loss and deafness (AR)                  | c.101T>C p.(Met34Thr)                                                                                                                                     | heterozygous                                     |
| NB060 | negative      | negative | positive- <i>MYO3A</i> and <i>RBM8A</i> variants                    | <i>MYO3A, RBM8A</i>      | sensorineural hearing loss/deafness (AR); TAR syndrome (AR)  | <i>MYO3A</i> c.4681C>T p.(Arg1561*); <i>RBM8A</i> n.500C>T c.-21G>A p.(?)                                                                                 | heterozygous for both variants in variant column |

**Table S2: Additional findings in the NC NEXUS cohort.**

The NC NEXUS participant column includes “M” (indicating inborn errors of metabolism cohort), “HL” (indicating hearing loss cohort) or “NB” (indicating healthy/well-child cohort) followed by the participant number. Each row in the table represents one NC NEXUS participant. “Positive” indicates the presence of likely pathogenic or pathogenic variants in genes in an additional findings category (childhood-onset nonactionable, adult-onset actionable, and carrier status). “Negative” indicates the absence of likely pathogenic or pathogenic variants found in genes in the additional findings categories. The “Gene” column indicates the gene(s) in which the additional finding variants were found (if requested). The “Variant and (predicted protein change)” column indicates the coding change in the DNA reference sequence and predicted change of the protein in parentheses. The “Zygoty in NC NEXUS participant” column indicates the zygoty for each variant found in additional findings for each participant (if requested). AR= autosomal recessive pattern of inheritance; N/A= not applicable; XL= X-linked pattern of inheritance; MPS I= mucopolysaccharidosis type I.

| Gene           | Refseq chromosome reference, Refseq transcript, variant | Chromosome coordinates of variant (hg38) | Canonical allele identifier from ClinGen Allele Registry | Accession number of variants in ClinVar |
|----------------|---------------------------------------------------------|------------------------------------------|----------------------------------------------------------|-----------------------------------------|
| AARS2          | NC_000006.12(NM_020745.3):c.2559-1G>A                   | chr6:44301465                            | CA364336148                                              | VCV000873458                            |
| ACADM          | NC_000001.11(NM_000016.5):c.199T>C                      | chr1:75732724                            | CA252836                                                 | VCV000003597                            |
| ACADM          | NC_000001.11(NM_000016.5):c.799G>A                      | chr1:75749509                            | CA252824                                                 | VCV000003588                            |
| ACADM          | NC_000001.11(NM_000016.5):c.985A>G                      | chr1:75761161                            | CA252821                                                 | VCV000003586                            |
| AGK            | NC_000007.14(NM_018238.3):c.523_524del                  | chr7:141621734-141621735                 | CA834306559                                              | VCV000873475                            |
| APTX           | NC_000009.12(NM_001195248.1):c.837G>A                   | chr9:32974495                            | CA253152                                                 | VCV000004431                            |
| ARMC4          | NC_000010.11(NM_018076.4):c.2219G>A                     | chr10:27936759                           | CA5453275                                                | VCV000242859                            |
| ASL            | NC_000007.14(NM_000048.3):c.544C>T                      | chr7:66086763                            | CA220291                                                 | VCV000092362                            |
| ATP13A2        | NC_000001.11(NM_022089.3):c.558-1G>T                    | chr1:17002374                            | CA338260662                                              | VCV000873473                            |
| ATP13A2        | NC_000001.11(NM_022089.3):c.2135_2136del                | chr1:16991849-16991850                   | CA915940655                                              | VCV000873463                            |
| ATP7B          | NC_000013.11(NM_000053.3):c.1934T>G                     | chr13:51961849                           | CA252899                                                 | VCV000003862                            |
| BBS1           | NC_000011.10(NM_024649.4):c.1169T>G                     | chr11:66526181                           | CA223760                                                 | VCV000012143                            |
| BCKDHA         | NC_000019.10(NM_000709.4):c.1312T>A                     | chr19:41424582                           | CA115507                                                 | VCV000100009                            |
| BRCA2          | NC_000013.11(NM_000059.3):c.7480C>T                     | chr13:32356472                           | CA025108                                                 | VCV000038099                            |
| CD36           | NC_000007.14(NM_001001547.2):c.787_808del               | chr7:80669991-80670012                   | CA4315410                                                | VCV000873470                            |
| CDK5RAP2       | NC_000009.12(NM_001011649.2):c.4114C>T                  | chr9:120419851                           | CA5213660                                                | VCV000873462                            |
| CEP290         | NC_000012.12(NM_025114.3):c.4437+1G>A                   | chr12:88086038                           | CA6711940                                                | VCV000285948                            |
| CEMIP/KIAA1199 | NC_000015.10(NM_018689.2):c.58C>T                       | chr15:80873937                           | CA7692526                                                | N/A                                     |
| CFTR           | NC_000007.14(NM_000492.3):c.1519_1521del                | chr7:117559590-117559592                 | CA340628                                                 | VCV000007106                            |
| CFTR           | NC_000007.14(NM_000492.3):c.1521_1523del                | chr7:117559592-117559594                 | CA118639                                                 | VCV000007105                            |
| CYP21A2        | NC_000006.12(NM_000500.7):c.1360C>T                     | chr6:32041006                            | CA341186                                                 | VCV000012159                            |
| DARS2          | NC_000001.11(NM_018122.4):c.493-1G>C                    | chr1:173833375                           | CA1250153                                                | VCV000873471                            |
| DNAH11         | NC_000007.14(NM_001277115.1):c.6983+1G>A                | chr7:21711861                            | CA4181054                                                | VCV000873476                            |
| DOCK8          | NC_000009.12(NM_203447.3):c.54-1G>T                     | chr9:271626                              | CA4957100                                                | VCV000265359                            |
| DSC2           | NC_000018.10(NM_024422.6):c.631-2A>G                    | chr18:31087815                           | CA022880                                                 | VCV000016850                            |
| DYNC2H1        | NC_000011.10(NM_001080463.1):c.8283del                  | chr11:103203748                          | CA601231441                                              | VCV000873461                            |
| ERCC6          | NC_000010.11(NM_000124.3):c.3952_3953del                | chr10:49461382-49461383                  | CA274713                                                 | VCV000190171                            |
| F5             | NC_000001.11(NM_000130.4):c.1601G>A                     | chr1:169549811                           | CA114378                                                 | VCV000000642                            |
| F7             | NC_000013.11(NM_000131.4):c.1151C>T                     | chr13:113118758                          | CA7060229                                                | VCV000420160                            |
| F11            | NC_000004.12(NM_000128.3):c.1489C>T                     | chr4:186286423                           | CA3164011                                                | VCV000280137                            |
| F11            | NC_000004.12(NM_000128.3):c.1608G>C                     | chr4:186287715                           | CA3164056                                                | VCV000873465                            |
| G6PC           | NC_000017.11(NM_000151.3):c.562G>A                      | chr17:42909418                           | CA321440                                                 | VCV000214465                            |
| G6PD           | NC_000023.11(NM_000402.4):c.292G>A                      | chrX:154536002                           | CA090913                                                 | VCV000037123                            |
| G6PD           | NC_000023.11(NM_000402.4):c.466A>G                      | chrX:154535277                           | CA120939                                                 | VCV000100055                            |
| GAA            | NC_000017.11(NM_000152.4):c.-32-13T>G                   | chr17:80104542                           | CA116606                                                 | VCV000004027                            |
| GALT           | NC_000009.12(NM_000155.3):c.940A>G                      | chr9:34649445                            | CA116380                                                 | VCV000003613                            |
| GALT           | NC_000009.12(NM_000155.3):c.563A>G                      | chr9:34648170                            | CA312566                                                 | VCV000003614                            |
| GJB2           | NC_000013.11(NM_004004.5):c.35del                       | chr13:20189552                           | CA127023                                                 | VCV000017004                            |
| GJB2           | NC_000013.11(NM_004004.5):c.101T>C                      | chr13:20189481                           | CA172206                                                 | VCV000017000                            |
| GNE            | NC_000009.12(NM_001128227.2):c.1985C>T                  | chr9:36218224                            | CA253717                                                 | VCV000006035                            |
| GNRHR          | NC_000004.12(NM_000406.2):c.785G>A                      | chr4:67740682                            | CA130198                                                 | VCV000016024                            |
| GUSB           | NC_000007.14(NM_000181.3):c.1069C>T                     | chr7:65974701                            | CA199717                                                 | VCV000000908                            |
| HFE            | NC_000006.12(NM_000410.3):c.187C>G                      | chr6:26090951                            | CA113797                                                 | VCV000000010                            |
| HFE            | NC_000006.12(NM_000410.3):c.845G>A                      | chr6:26092913                            | CA113795                                                 | VCV000000009                            |

|                 |                                            |                           |             |              |
|-----------------|--------------------------------------------|---------------------------|-------------|--------------|
| <i>HPS3</i>     | NC_000003.12(NM_032383.4):c.1682_1683del   | chr3:149157522-149157523  | CA2660145   | VCV000662551 |
| <i>IDUA</i>     | NC_000004.12(NM_000203.4):c.208C>T         | chr4:987858               | CA204563    | VCV000011909 |
| <i>IDUA</i>     | NC_000004.12(NM_000203.4):c.979G>C         | chr4:1002275              | CA234128    | VCV000167190 |
| <i>IGHMBP2</i>  | NC_000011.10(NM_002180.2):c.1488C>A        | chr11:68933864            | CA6153662   | VCV000234316 |
| <i>KIAA0586</i> | NC_000014.9(NM_001244189.1):c.428del       | chr14:58432439            | CA204046    | VCV000204593 |
| <i>LDLR</i>     | NC_000019.10(NM_000527.4):c.502G>A         | chr19:11105408            | CA023709    | VCV000183136 |
| <i>LOXHD1</i>   | NC_000018.10(NM_144612.6):c.2914G>A        | chr18:46560230            | CA8952596   | VCV000228822 |
| <i>LOXHD1</i>   | NC_000018.10(NM_144612.6):c.3161C>T        | chr18:46559503            | CA8952552   | VCV000873467 |
| <i>MARVELD2</i> | NC_000005.10(NM_001038603.3):c.1183-1G>A   | chr5:69432526             | CA3294206   | VCV000001195 |
| <i>MCCC1</i>    | NC_000003.12(NM_020166.4):c.1483C>T        | chr3:183037329            | CA355320552 | VCV000873469 |
| <i>MCPH1</i>    | NC_000008.11(NM_024596.4):c.2214+2T>C      | chr8:6499931              | CA4610864   | VCV000873472 |
| <i>MLYCD</i>    | NC_000016.10(NM_012213.3):c.1013T>C        | chr16:83915020            | CA8197484   | VCV000432061 |
| <i>MMAB</i>     | NC_000012.12(NM_052845.3):c.556C>T         | chr12:109561068           | CA312714    | VCV000003095 |
| <i>MMACHC</i>   | NC_000001.11(NM_015506.2):c.331C>T         | chr1:45508266             | CA251789    | VCV000001424 |
| <i>MPL</i>      | NC_000001.11(NM_005373.2):c.1192del        | chr1:43346818             | CA915940656 | VCV000873477 |
| <i>MYH14</i>    | NC_000019.10(NM_024729.3):c.5942G>C        | chr19:50309744            | CA406966312 | VCV000873466 |
| <i>MYO3A</i>    | NC_000010.11(NM_017433.4):c.4681C>T        | chr10:26203058            | CA5445544   | VCV000631635 |
| <i>MYO7A</i>    | NC_000011.10(NM_000260.4):c.5824G>A        | chr11:77207370            | CA132400    | VCV000043299 |
| <i>NR2E3</i>    | NC_000015.10(NM_014249.3):c.932G>A         | chr15:71813573            | CA117575    | VCV000005532 |
| <i>OCRL</i>     | NC_000023.11(NM_000276.3):c.741G>A         | chrX:129560568            | CA414551955 | VCV000873459 |
| <i>OTC</i>      | NC_000023.11(NM_000531.6):c.1061T>G        | chrX:38421078             | CA224450    | VCV000097104 |
| <i>PAH</i>      | NC_000012.12(NM_000277.2):c.117C>G         | chr12:102912842           | CA251537    | VCV000000605 |
| <i>PAH</i>      | NC_000012.12(NM_000277.2):c.194T>C         | chr12:102894893           | CA251544    | VCV000000636 |
| <i>PAH</i>      | NC_000012.12(NM_000277.2):c.284_286del     | chr12:102894801-102894803 | CA251535    | VCV000000604 |
| <i>PAH</i>      | NC_000012.12(NM_000277.2):c.782G>A         | chr12:102852875           | CA251528    | VCV000000582 |
| <i>PAH</i>      | NC_000012.12(NM_000277.2):c.814G>T         | chr12:102852843           | CA251532    | VCV000000596 |
| <i>PAH</i>      | NC_000012.12(NM_000277.2):c.842C>T         | chr12:102852815           | CA220589    | VCV000000589 |
| <i>PAH</i>      | NC_000012.12(NM_000277.2):c.896T>G         | chr12:102851703           | CA251541    | VCV000000613 |
| <i>PAH</i>      | NC_000012.12(NM_000277.2):c.1222C>T        | chr12:102840493           | CA251523    | VCV000000577 |
| <i>PAH</i>      | NC_000012.12(NM_000277.2):c.1315+1G>A      | chr12:102840399           | CA251522    | VCV000000576 |
| <i>PEX1</i>     | NC_000007.14(NM_000466.2):c.2614C>T        | chr7:92499808             | CA4341072   | VCV000265395 |
| <i>PFKM</i>     | NC_000012.12(NM_001166686.1):c.496C>T      | chr12:48132913            | CA114806    | VCV000001158 |
| <i>PHYH</i>     | NC_000010.11(NM_006214.3):c.823C>T         | chr10:13283695            | CA118904    | VCV000007580 |
| <i>PMM2</i>     | NC_000016.10(NM_000303.2):c.422G>A         | chr16:8811153             | CA220621    | VCV000007706 |
| <i>POLG</i>     | NC_000015.10(NM_002693.2):c.1399G>A        | chr15:89327201            | CA123140    | VCV000013496 |
| <i>RAD51C</i>   | NC_000017.11(NM_058216.2):c.905-2_905-1del | chr17:58724038-58724039   | CA166374    | VCV000141768 |
| <i>RBM8A</i>    | NC_000001.11(NM_005105.5):c.-21G>A         | chr1:145927447            | CA249745    | VCV000030464 |
| <i>RNASEH2B</i> | NC_000013.11(NM_024570.3):c.2T>C           | chr13:50910078            | CA388258350 | VCV000661979 |
| <i>RPE65</i>    | NC_000001.11(NM_000329.2):c.271C>T         | chr1:68444858             | CA226531    | VCV000013115 |
| <i>SERPINA1</i> | NC_000014.9(NM_000295.4):c.187C>T          | chr14:94383051            | CA325650    | VCV000017974 |
| <i>SERPINA1</i> | NC_000014.9(NM_000295.4):c.863A>T          | chr14:94380925            | CA127679    | VCV000017969 |
| <i>SERPINA1</i> | NC_000014.9(NM_000295.4):c.1096G>A         | chr14:94378610            | CA127676    | VCV000017967 |
| <i>SIL1</i>     | NC_000005.10(NM_022464.4):c.645+2T>C       | chr5:139026799            | CA252368    | VCV000002624 |
| <i>SLC22A5</i>  | NC_000005.10(NM_003060.4):c.506G>A         | chr5:132384155            | CA312938    | VCV000006421 |
| <i>SLC26A4</i>  | NC_000007.14(NM_000441.1):c.2015G>A        | chr7:107702038            | CA261423    | VCV000043532 |
| <i>SLC26A4</i>  | NC_000007.14(NM_000441.1):c.626G>T         | chr7:107674970            | CA253304    | VCV000004821 |
| <i>SLC26A4</i>  | NC_000007.14(NM_000441.1):c.1151A>G        | chr7:107690125            | CA261398    | VCV000004820 |
| <i>SLC7A9</i>   | NC_000019.10(NM_014270.4):c.544G>A         | chr19:32862521            | CA211245    | VCV000005782 |
| <i>SMARCAL1</i> | NC_000002.12(NM_014140.3):c.2542G>T        | chr2:216478216            | CA253017    | VCV000004171 |
| <i>SOX10</i>    | NC_000022.11(NM_006941.3):c.482G>A         | chr22:37978082            | CA10228669  | VCV000873468 |
| <i>TECTA</i>    | NC_000011.10(NM_005422.2):c.5597C>T        | chr11:121168064           | CA6327783   | VCV000236058 |
| <i>TMPRSS3</i>  | NC_000021.9(NM_024022.2):c.208del          | chr21:42389043            | CA273243    | VCV000165492 |
| <i>TMPRSS3</i>  | NC_000021.9(NM_024022.2):c.1151T>A         | chr21:42376584            | CA10042329  | VCV000873474 |
| <i>TYR</i>      | NC_000011.10(NM_000372.4):c.1217C>T        | chr11:89284805            | CA227519    | VCV000003777 |
| <i>USH2A</i>    | NC_000001.11(NM_206933.2):c.1256G>T        | chr1:216324240            | CA252239    | VCV000002359 |
| <i>USH2A</i>    | NC_000001.11(NM_206933.2):c.2299del        | chr1:216247095            | CA252226    | VCV000002351 |

|              |                                          |                          |             |              |
|--------------|------------------------------------------|--------------------------|-------------|--------------|
| <i>USH2A</i> | NC_000001.11(NM_206933.2):c.3686T>G      | chr1:216199752           | CA344867902 | VCV000873464 |
| <i>USH2A</i> | NC_000001.11(NM_206933.2):c.4338_4339del | chr1:216190280-216190281 | CA252228    | VCV000002353 |
| <i>USH2A</i> | NC_000001.11(NM_206933.2):c.6937G>T      | chr1:215970645           | CA1394996   | VCV000384319 |
| <i>VWF</i>   | NC_000012.12(NM_000552.4):c.2561G>A      | chr12:6034812            | CA114139    | VCV000000296 |
| <i>WRN</i>   | NC_000008.11(NM_000553.5):c.561A>G       | chr8:31067089            | CA275342    | VCV000198099 |

**Table S3. Summary table of all variants reported in the NC NEXUS study.**

Table contains columns describing: the gene in which each variant was found (represented by gene symbol); Refseq chromosome reference number, Refseq transcript number and variant; chromosome coordinates of each variant (hg38); the canonical allele identifier of each variant in the ClinGen Allele Registry; the variants' accession numbers in the ClinVar database.
